# Supplementary material for: Global scientific trends on exosome research during 2007–2016: a bibliometric analysis
Source: PubMed Central journal article supplement (PMC5564662; doi:10.18632/oncotarget.17223), 2017-04-19
Supplement: oncotarget-08-48460-s001.pdf [file oncotarget-08-48460-s001.pdf]

## **Global scientific trends on exosome research during 2007–2016: a bibliometric analysis**

### **SUPPLEMENTARY TABLES**

#### **Supplementary Table 1: Details of the total 1852 studies**

See Supplementary File 1

#### **Supplemental Table 2: Details of Group Items by Cluster in VOSviewer**

See Supplementary File 2
